# Supplementary material for: Synthesis, characterization and properties of sulfate-modified silver carbonate with enhanced visible light photocatalytic performance
Source: Royal Society of Chemistry journal article supplement (doi:10.1039/d3ra03120a), 2023-01-01
Supplement: d3ra03120a1.pdf [file d3ra03120a1.pdf]

# **Synthesis, Characterizations and Properties of Sulfate-doped Silver Carbonate $\text{SO}_4^{2-}$ - $\text{Ag}_2\text{CO}_3$ with Enhanced Visible Light Photocatalytic Performances**

**Sara Ghazi<sup>a,b</sup>, Benaissa Rhouta<sup>a\*</sup>, Claire Tendero<sup>b</sup>, Francis Maury<sup>b</sup>**

*a) IMED-Lab, Sciences and Technologies Faculty, Cadi Ayyad University, Avenue Abdelkrim Khattabi, Box 549, Marrakech, Maroc.*

*b) CIRIMAT, Université de Toulouse, CNRS-UPS-INP, ENSIACET, 4 allée Emile Monso, BP 44362, 31030 Toulouse, cedex 4, France.*

Corresponding author e-mail address: [b.rhouta@uca.ma](mailto:b.rhouta@uca.ma)

## **CONTENT**

- 1- XRD data of photocatalysts (Table S1)**
- 2- DLS grain size distribution (Fig. S1)**
- 3- Optical properties of photocatalysts (Table S2)**
- 4- Calculation of  $\text{Ag}^+$ -anion interactions by the Pearson model (Table S3)**
- 5- References.**

## 1- XRD data of photocatalysts

**Table S1:** Lattice parameters of the monoclinic cell of pure  $\text{Ag}_2\text{CO}_3$  and  $\text{SO}_4^{2-}$  modified  $\text{Ag}_2\text{CO}_3$  photocatalysts assessed from all the peaks of XRD patterns of Fig. 1 using the Unit Cell software [1].

| Lattice constants                  | Pure $\text{Ag}_2\text{CO}_3$ | $\text{SO}_4^{2-}\text{-Ag}_2\text{CO}_3$ | Relative difference |
|------------------------------------|-------------------------------|-------------------------------------------|---------------------|
| $a$ (Å)                            | 4.7822                        | 4.8098                                    | +0.6%               |
| $b$ (Å)                            | 9.6118                        | 9.6395                                    | +0.3%               |
| $c$ (Å)                            | 3.2128                        | 3.2178                                    | +0.2%               |
| $\beta$ (°)                        | 93.22                         | 93.28                                     | +0.1%               |
| Unit cell Volume (Å <sup>3</sup> ) | 147.45                        | 148.95                                    | +1.0%               |

## 2- Grain size distribution

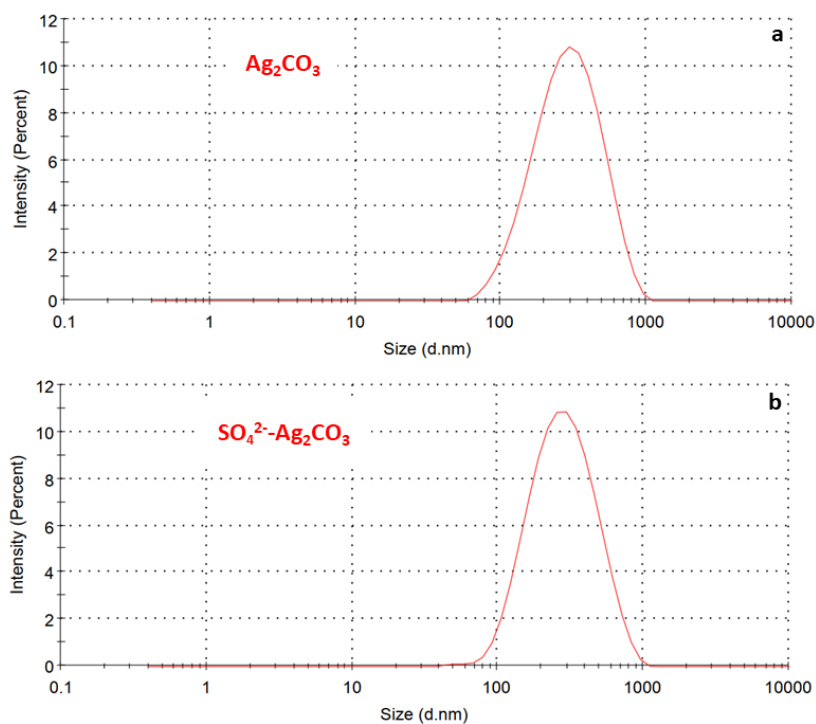

**Fig. S1:** DLS grain size distribution of (a) pure  $\text{Ag}_2\text{CO}_3$  and (b)  $\text{SO}_4^{2-}\text{-Ag}_2\text{CO}_3$ .

### 3- Optical properties of photocatalysts

**Table S2:** Literature data giving representative values of experimental band gap energy ( $E_g$ ) of  $\text{Ag}_2\text{CO}_3$ , as well as energy of the top of valence band ( $E_{\text{VB}}$ ) and that of the bottom of the conduction band ( $E_{\text{CB}}$ ). When they were not available in the cited references,  $E_{\text{VB}}$  and  $E_{\text{CB}}$  were calculated with the equations given in the sub-section 3.1 of the paper using values of  $E_g$  and the absolute electronegativity.

| Semiconductor compounds                   | $E_g$ (eV) | $E_{\text{VB}}$ (eV) | $E_{\text{CB}}$ (eV) | Ref.             |
|-------------------------------------------|------------|----------------------|----------------------|------------------|
| $\text{Ag}_2\text{CO}_3$                  | 2.30       | 2.67                 | 0.37                 | [2]              |
|                                           | 2.31       | 2.69                 | 0.37                 | [3]              |
|                                           | 2.37       | 2.70                 | 0.30                 | [4]              |
|                                           | 2.46       | 2.75                 | 0.29                 | [5]              |
|                                           | 2.50       | 2.77                 | 0.27                 | [6]              |
|                                           | 2.62       | 2.83                 | 0.21                 | [7]              |
|                                           | 2.62       | 2.83                 | 0.21                 | <i>This work</i> |
| $\text{SO}_4^{2-}\text{-Ag}_2\text{CO}_3$ | 2.56       | 2.80                 | 0.24                 | <i>This work</i> |

### 4- Calculation of $\text{Ag}^+$ -anion interaction (Pearson model)

According to R.G. Pearson [8], in a system comprising 2 entities, the difference in electronegativity ( $\chi$ ) drives the electron transfer. Therefore, considering a cation  $\text{Ag}^+$  and an anion ( $\text{CO}_3^{2-}$  or  $\text{SO}_4^{2-}$ ) that are brought together, electrons will flow from that of lower electronegativity to that of higher  $\chi$  until the chemical potentials are equal. The absolute electronegativity and the absolute hardness ( $\eta$ ) regarding the entities forming sulfate-doped  $\text{Ag}_2\text{CO}_3$  are reported in Table S3.

For the complex anions, the values were calculated according to the Pearson equations:

$$\chi = q/R \quad (1)$$

$$\eta = 1/2R \quad (2)$$

where  $q$  = the charge of the ion and  $R$  is the polyatomic radius [9,10].

The  $\chi$  values show that when  $\text{Ag}^+$  and an anion are brought, electrons will flow from the complex anion to  $\text{Ag}^+$  (the anions  $\text{SO}_4^{2-}$  and  $\text{CO}_3^{2-}$  are donor D). Assuming only isolated systems, the fractional number of  $e^-$  transferred in these initial  $\text{Ag}^+$ -D interactions ( $\Delta N_{\text{Ag-D}}$ ) can be approximated by [8]:

$$\Delta N_{\text{Ag-D}} = (\chi_{\text{D}} - \chi_{\text{Ag}^+}) / [2(\eta_{\text{Ag}^+} + \eta_{\text{D}})] \quad (3)$$

The values reported in Table S3 indicate that  $\Delta N_{\text{Ag-D}}$  is 38% bigger with  $\text{SO}_4^{2-}$  compared to  $\text{CO}_3^{2-}$ , which reveals a stronger interaction of the sulfate with the  $\text{Ag}_2\text{CO}_3$  crystal lattice.

**Table S3:** Key data of cation ( $\text{Ag}^+$ ) and anions pertinent for the  $\text{SO}_4^{2-}$  doped  $\text{Ag}_2\text{CO}_3$  photocatalyst. The anions  $\text{PO}_4^{3-}$  is given for comparison. Data were determined from the Pearson approximation [8] using equations reported above and ionic radius that [9,10].

| Ion                | Ionic radius R (nm) | Absolute electronegativity $\chi$ (eV) | Absolute hardness $\eta$ (eV) | $\Delta N_{\text{Ag-D}}$ | Ref.   |
|--------------------|---------------------|----------------------------------------|-------------------------------|--------------------------|--------|
| $\text{Ag}^+$      | 0.126               | 14.53                                  | 6.96                          | N/A                      | [8]    |
| $\text{CO}_3^{2-}$ | 0.189               | 10.58                                  | 2.65                          | 0.21                     | [9,10] |
| $\text{SO}_4^{2-}$ | 0.218               | 9.17                                   | 2.29                          | 0.29                     | [9,10] |
| $\text{PO}_4^{3-}$ | 0.230               | 13.04                                  | 2.17                          | 0.08                     | [9,10] |

## 5- References

- [1] T. J. B. Holland, S. A. T. Redfern, Unit cell refinement from powder diffraction data: the use of regression diagnostics, *Mineralogical Magazine*. 61 (1997) 65–77. <https://doi.org/10.1180/minmag.1997.061.404.07>.
- [2] G. Dai, J. Yu, G. Liu, A New Approach for Photocorrosion Inhibition of  $\text{Ag}_2\text{CO}_3$  Photocatalyst with Highly Visible-Light-Responsive Reactivity, *J. Phys. Chem. C*. 116 (2012) 15519–15524. <https://doi.org/10.1021/jp305669f>.

- [3] W. Jiang, Y. Zeng, X. Wang, X. Yue, S. Yuan, H. Lu, B. Liang, Preparation of Silver Carbonate and its Application as Visible Light-driven Photocatalyst Without Sacrificial Reagent, *Photochemistry and Photobiology*. 91 (2015) 1315–1323.  
<https://doi.org/10.1111/php.12495>
- [4] Y. Li, L. Fang, R. Jin, Y. Yang, X. Fang, Y. Xing, S. Song, Preparation and enhanced visible light photocatalytic activity of novel g-C<sub>3</sub>N<sub>4</sub> nanosheets loaded with Ag<sub>2</sub>CO<sub>3</sub> nanoparticles, *Nanoscale*, 7 (2015) 758-764. <https://doi.org/10.1039/C4NR06565D>
- [5] H. Dong, G. Chen, J. Sun, C. Li, Y. Yu, D. Chen, A novel high-efficiency visible-light sensitive Ag<sub>2</sub>CO<sub>3</sub> photocatalyst with universal photodegradation performances: Simple synthesis, reaction mechanism and first-principles study, *Applied Catalysis B: Environmental*. 134–135 (2013) 46–54. <https://doi.org/10.1016/j.apcatb.2012.12.041>.
- [6] E. Nyankson, B. Agyei-Tuffour, E. Annan, A. Yaya, B. Mensah, B. Onwona-Agyeman, R. Amedalor, B. Kwaku-Frimpong, J.K. Efavi, Ag<sub>2</sub>CO<sub>3</sub>-halloysite nanotubes composite with enhanced removal efficiency for water soluble dyes, *Heliyon*. 5 (2019) e01969.  
<https://doi.org/10.1016/j.heliyon.2019.e01969>.
- [7] W. Fa, P. Wang, B. Yue, F. Yang, D. Li, Z. Zheng, Ag<sub>3</sub>PO<sub>4</sub>/Ag<sub>2</sub>CO<sub>3</sub> p–n heterojunction composites with enhanced photocatalytic activity under visible light, *Chinese Journal of Catalysis*. 36 (2015) 2186–2193. [https://doi.org/10.1016/S1872-2067\(15\)61004-X](https://doi.org/10.1016/S1872-2067(15)61004-X)
- [8] R.G. Pearson, Absolute electronegativity and hardness: application to inorganic chemistry, *Inorg. Chem*. 27 (1988) 734–740. <https://doi.org/10.1021/ic00277a030>
- [9] H.K. Roobottom, H.D.B. Jenkins, J. Passmore, L. Glasser, Thermochemical Radii of Complex Ions, *J. Chem. Educ*. 76 (1999) 1570. <https://doi.org/10.1021/ed076p1570>

- [10] M.C. Simoes, K.J. Hughes, D.B. Ingham, L. Ma, M. Pourkashanian, Estimation of the Thermochemical Radii and Ionic Volumes of Complex Ions, *Inorg. Chem.* 56 (2017) 7566–7573. <https://doi.org/10.1021/acs.inorgchem.7b01205>.
